# Supplementary material for: Role of Metcalfa pruinosa as a Vector for Pseudomonas syringae pv. actinidiae
Source: PubMed Central journal article supplement — Plant Pathol J. 2017 Dec 1;33(6):554–60. doi: 10.5423/PPJ.OA.04.2017.0074 (PMC5720602; doi:10.5423/ppj.oa.04.2017.0074), 2017-12-01
Supplement: ppj-33-554_suppl.pdf [file ppj-33-554_suppl.pdf]

**Supplementary Table 1.** Bacterial population, determined by qPCR on *Metcalfa pruinosa* samples, collected in a Psa-infected orchard in mid-June (juveniles) and at the end of July (adults). The standard error of technical replicates is shown

|    | Bacterial population (cfu insect <sup>-1</sup> ) |                             |
|----|--------------------------------------------------|-----------------------------|
|    | <i>neanids</i>                                   | <i>adults</i>               |
| 1  | $(4.1 \pm 3.0) \times 10^4$                      | Not detected                |
| 2  | Not detected                                     | $(1.6 \pm 0.6) \times 10^2$ |
| 3  | Not detected                                     | Not detected                |
| 4  | Not detected                                     | Not detected                |
| 5  | $(3.7 \pm 3.1) \times 10^4$                      | Not detected                |
| 6  | $(1.1 \pm 0.6) \times 10^7$                      | Not detected                |
| 7  | Not detected                                     | $(1.1 \pm 0.6) \times 10^3$ |
| 8  | Not detected                                     | Not detected                |
| 9  | Not detected                                     | Not detected                |
| 10 | $(2.6 \pm 1.1) \times 10^2$                      | Not detected                |

**Supplementary Table 2.** Population of *Pseudomonas syringae* pv. *actinidiae* in the experimentally infected plants and in the non-inoculated plants after vector insect feeding, determined by qPCR protocol. The standard error of technical replicates is shown

| Experimentally infected plants (cfu g <sup>-1</sup> ) | Non-inoculated, recipient plants (cfu g <sup>-1</sup> ) |
|-------------------------------------------------------|---------------------------------------------------------|
| $(8.6 \pm 1.2) \times 10^4$                           | $(1.2 \pm 0.4) \times 10^3$                             |
|                                                       | $(6.8 \pm 2.3) \times 10^2$                             |
| $(2.2 \pm 0.7) \times 10^5$                           | Not detected                                            |
|                                                       | $(9.1 \pm 3.4) \times 10^3$                             |
| $(9.6 \pm 4.5) \times 10^4$                           | $(8.3 \pm 1.9) \times 10^4$                             |
|                                                       | $(5.1 \pm 0.9) \times 10^3$                             |
| $(7.5 \pm 1.2) \times 10^5$                           | $(2.0 \pm 1.1) \times 10^2$                             |
| $(1.1 \pm 0.9) \times 10^6$                           | Not detected                                            |
| $(1.5 \pm 0.4) \times 10^5$                           | $(1.9 \pm 0.2) \times 10^3$                             |
| $(1.3 \pm 0.3) \times 10^5$                           | $(1.3 \pm 0.2) \times 10^5$                             |
| $(5.3 \pm 0.6) \times 10^5$                           | $(1.2 \pm 5.2) \times 10^4$                             |
| $(1.1 \pm 0.2) \times 10^6$                           | $(2.7 \pm 0.2) \times 10^5$                             |
| $(1.3 \pm 0.8) \times 10^6$                           | $(1.8 \pm 0.8) \times 10^3$                             |
| $(5.2 \pm 1.1) \times 10^6$                           | $(4.0 \pm 0.8) \times 10^3$                             |
